# Supplementary material for: New fluoroborate Cd8B5O15F with two different isolated borate anions prepared by an open high-temperature solution method
Source: Royal Society of Chemistry journal article supplement (doi:10.1039/c6dt00621c), 2016-01-01
Supplement: c6dt00621c1.pdf [file c6dt00621c1.pdf]

## Supporting Information

### **New Fluoroborate $\text{Cd}_8\text{B}_5\text{O}_{15}\text{F}$ with Two Different Isolated Borate Anions Prepared by an Open High-Temperature Solution Method**

Yun Yang,<sup>a</sup> Xiaoyu Dong<sup>a,b</sup> and Shilie Pan<sup>a\*</sup>

<sup>a</sup> Key Laboratory of Functional Materials and Devices for Special Environments, Xinjiang Technical Institute of Physics & Chemistry, Chinese Academy of Sciences; Xinjiang Key Laboratory of Electronic Information Materials and Devices, 40-1 South Beijing Road, Urumqi 830011, China;

<sup>b</sup> Engineering Department of Chemistry and Environment, Xinjiang Institute of Engineering, 236 Nanchang Road, Urumqi 830091, China

Figure S1. TG/DSC curves of  $\text{Cd}_8\text{B}_5\text{O}_{15}\text{F}$ .

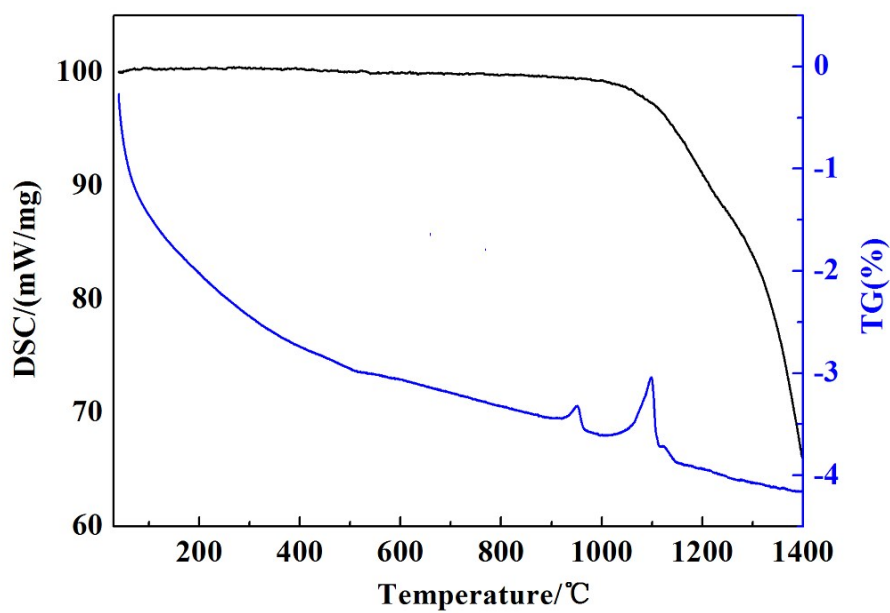

Figure S2. Infrared spectroscopy of the  $\text{Cd}_8\text{B}_5\text{O}_{15}\text{F}$  sample.

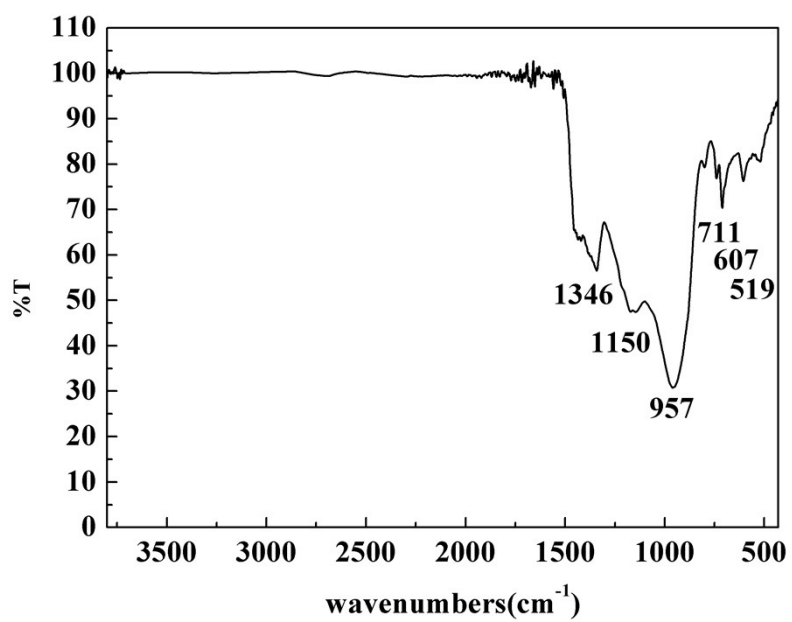

Figure S3. XPS spectra of F1s of the  $\text{Cd}_8\text{B}_5\text{O}_{15}\text{F}$  sample.

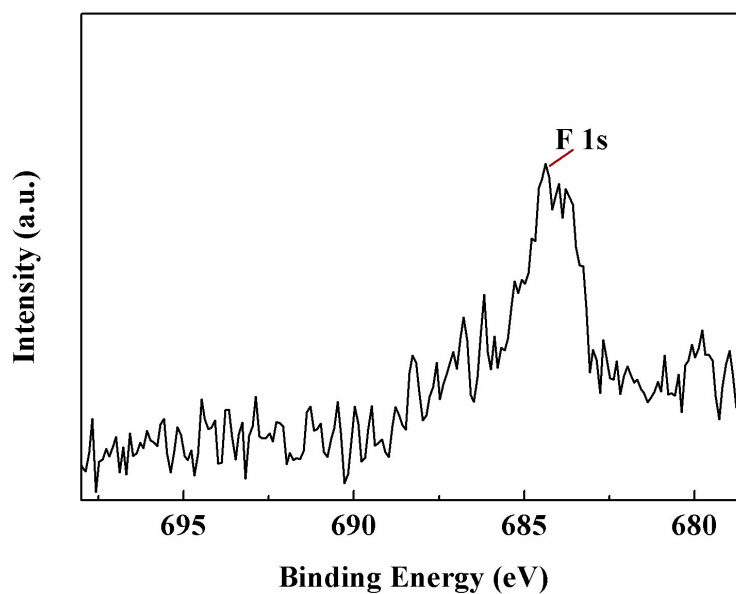

Figure S4. FT-Raman spectrum of  $\text{Cd}_8\text{B}_5\text{O}_{15}\text{F}$ .

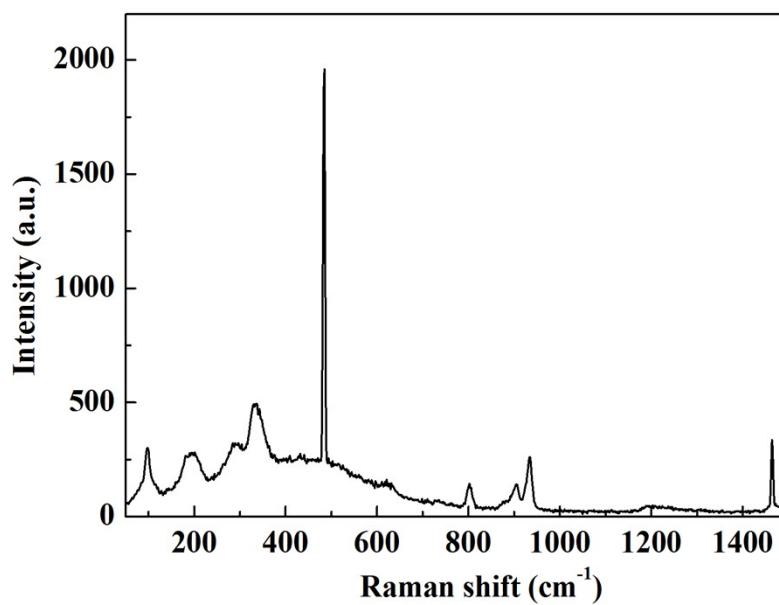

**Table S1.** Selected bond distances (Å) and angles (deg) for Cd<sub>8</sub>B<sub>5</sub>O<sub>15</sub>F.

|                       |           |                       |            |
|-----------------------|-----------|-----------------------|------------|
| Cd(1))-O(2)#1         | 2.281(12) | Cd(2))-O(2)#8         | 2.320 (13) |
| Cd(1))-O(2)#2         | 2.281(12) | Cd(2))-O(2)#9         | 2.320(13)  |
| Cd(1))-O(2)#3         | 2.281(12) | Cd(2))-O(2)#10        | 2.320(13)  |
| Cd(1))-O(2)#4         | 2.281(12) | Cd(2))-O(2)#2         | 2.320(13)  |
| Cd(1))-O(2)#5         | 2.307(14) | Cd(2))-O(2)#11        | 2.320(13)  |
| Cd(1))-O(2)           | 2.307(14) | Cd(2))-O(2)#12        | 2.320(13)  |
| Cd(1))-O(2)#6         | 2.307(14) | Cd(2))-O(2)#4         | 2.320(13)  |
| Cd(1))-O(2)#7         | 2.307(14) | Cd(2))-O(2)#7         | 2.320(13)  |
| Cd(1))-F(1)#6         | 2.394(3)  | Cd(2))-O(2)#13        | 2.320(13)  |
| Cd(1))-O(1)#6         | 2.394(3)  | Cd(2))-O(2)           | 2.320(13)  |
| Cd(1))-O(1)           | 2.394(3)  | Cd(2))-O(2)#14        | 2.320(13)  |
| B(1))-O(1)            | 1.47(2)   | Cd(2))-O(2)#15        | 2.320(13)  |
| B(1))-F(1)            | 1.47(2)   | B(2))-O(2)            | 1.352(14)  |
| B(1))-O(1)#19         | 1.47(2)   | B(2))-O(2)#5          | 1.352(14)  |
| B(1))-F(1)#19         | 1.47(2)   | B(2))-O(2)#21         | 1.352(14)  |
| B(1))-O(1)#20         | 1.47(2)   | B(1))-O(1)#6          | 1.47(2)    |
| B(1))-F(1)#20         | 1.47(2)   | B(1))-F(1)#6          | 1.47(2)    |
| O(2)#1-Cd(1))-O(2)#2  | 174.9(7)  | O(2)#2-Cd(1))-O(2)#4  | 31.6(7)    |
| O(2)#1-Cd(1))-O(2)#3  | 31.6(7)   | O(2)#3-Cd(1))-O(2)#4  | 174.9(7)   |
| O(2)#2-Cd(1))-O(2)#3  | 148.0(7)  | O(2)#1-Cd(1))-O(2)#5  | 59.9(6)    |
| O(2)#1-Cd(1))-O(2)#4  | 148.0(7)  | O(2)#2-Cd(1))-O(2)#5  | 115.9(3)   |
| O(2)#3-Cd(1))-O(2)#5  | 80.1(6)   | O(2)#4-Cd(1))-O(2)#5  | 96.1(3)    |
| O(2)#1-Cd(1))-O(2)    | 96.1(3)   | O(2)#2-Cd(1))-O(2)    | 80.1(6)    |
| O(2)#3-Cd(1))-O(2)    | 115.9(3)  | O(2)#4-Cd(1))-O(2)    | 59.9(6)    |
| O(2)#5-Cd(1))-O(2)    | 36.9(7)   | O(2)#1-Cd(1))-O(2)#6  | 80.1(6)    |
| O(2)#2-Cd(1))-O(2)#6  | 96.1(3)   | O(2)-Cd(1))-O(2)#6    | 86.2(6)    |
| O(2)#3-Cd(1))-O(2)#6  | 59.9(6)   | O(2)#1-Cd(1))-O(2)#7  | 115.9(3)   |
| O(2)#4-Cd(1))-O(2)#6  | 115.9(3)  | O(2)#2-Cd(1))-O(2)#7  | 59.9(6)    |
| O(2)#5-Cd(1))-O(2)#6  | 74.5(6)   | O(2)#3-Cd(1))-O(2)#7  | 96.1(3)    |
| O(2)#4-Cd(1))-O(2)#7  | 80.1(6)   | O(2)#5-Cd(1))-O(2)#7  | 86.2(6)    |
| O(2)-Cd(1))-O(2)#7    | 74.5(6)   | O(2)#6-Cd(1))-O(2)#7  | 36.9(7)    |
| O(2)#1-Cd(1))-F(1)#6  | 100.1(4)  | O(2)#2-Cd(1))-F(1)#6  | 84.4(4)    |
| O(2)#3-Cd(1))-F(1)#6  | 84.4(4)   | O(2)#4-Cd(1))-F(1)#6  | 100.1(4)   |
| O(2)#5-Cd(1))-F(1)#6  | 159.3(4)  | O(2)-Cd(1))-F(1)#6    | 159.3(4)   |
| O(2)#6-Cd(1))-F(1)#6  | 109.3(6)  | O(2)#7-Cd(1))-F(1)#6  | 109.3(6)   |
| O(2)#1-Cd(1))-O(1)#6  | 100.1(4)  | O(2)#2-Cd(1))-O(1)#6  | 84.4(4)    |
| O(2)#3-Cd(1))-O(1)#6  | 84.4(4)   | O(2)#4-Cd(1))-O(1)#6  | 100.1(4)   |
| O(2)#5-Cd(1))-O(1)#6  | 159.3(4)  | O(2)-Cd(1))-O(1)#6    | 159.3(4)   |
| O(2)#6-Cd(1))-O(1)#6  | 109.3(6)  | O(2)#7-Cd(1))-O(1)#6  | 109.3(6)   |
| F(1)#6-Cd(1))-O(1)#6  | 0.0(3)    | O(2)#1-Cd(1))-O(1)    | 84.4(4)    |
| O(2)#2-Cd(1))-O(1)    | 100.1(4)  | O(2)#3-Cd(1))-O(1)    | 100.1(4)   |
| O(2)#4-Cd(1))-O(1)    | 84.4(4)   | O(2)#5-Cd(1))-O(1)    | 109.3(6)   |
| O(2)-Cd(1))-O(1)      | 109.3(6)  | O(2)#6-Cd(1))-O(1)    | 159.3(4)   |
| O(2)#7-Cd(1))-O(1)    | 159.3(4)  | F(1)#6-Cd(1))-O(1)    | 60.0(11)   |
| O(1)#6-Cd(1))-O(1)    | 60.0(11)  | O(2)#8-Cd(2))-O(2)#9  | 31.0(7)    |
| O(2)#8-Cd(2))-O(2)#10 | 59.2(7)   | O(2)#9-Cd(2))-O(2)#10 | 79.0(4)    |

|                        |            |                        |            |
|------------------------|------------|------------------------|------------|
| O(2)#8-Cd(2))-O(2)#2   | 101.0(4)   | O(2)#9-Cd(2))-O(2)#2   | 120.8(7)   |
| O(2)#10-Cd(2))-O(2)#2  | 106.0(6)   | O(2)#8-Cd(2))-O(2)#11  | 120.8(7)   |
| O(2)#9-Cd(2))-O(2)#11  | 101.0(4)   | O(2)#10-Cd(2))-O(2)#11 | 180.000(1) |
| O(2)#2-Cd(2))-O(2)#11  | 74.0(6)    | O(2)#8-Cd(2))-O(2)#12  | 79.0(4)    |
| O(2)#9-Cd(2))-O(2)#12  | 59.2(7)    | O(2)#10-Cd(2))-O(2)#12 | 74.0(6)    |
| O(2)#2-Cd(2))-O(2)#12  | 180.000(1) | O(2)#11-Cd(2))-O(2)#12 | 106.0(6)   |
| O(2)#8-Cd(2))-O(2)#4   | 74.0(6)    | O(2)#9-Cd(2))-O(2)#4   | 101.0(4)   |
| O(2)#10-Cd(2))-O(2)#4  | 79.0(4)    | O(2)#2-Cd(2))-O(2)#4   | 31.0(7)    |
| O(2)#11-Cd(2))-O(2)#4  | 101.0(4)   | O(2)#12-Cd(2))-O(2)#4  | 149.0(7)   |
| O(2)#8-Cd(2))-O(2)#7   | 149.0(7)   | O(2)#9-Cd(2))-O(2)#7   | 180.00(19) |
| O(2)#10-Cd(2))-O(2)#7  | 101.0(4)   | O(2)#2-Cd(2))-O(2)#7   | 59.2(7)    |
| O(2)#11-Cd(2))-O(2)#7  | 79.0(4)    | O(2)#12-Cd(2))-O(2)#7  | 120.8(7)   |
| O(2)#4-Cd(2))-O(2)#7   | 79.0(4)    | O(2)#8-Cd(2))-O(2)#13  | 180.000(1) |
| O(2)#9-Cd(2))-O(2)#13  | 149.0(7)   | O(2)#10-Cd(2))-O(2)#13 | 120.8(7)   |
| O(2)#2-Cd(2))-O(2)#13  | 79.0(4)    | O(2)#11-Cd(2))-O(2)#13 | 59.2(7)    |
| O(2)#12-Cd(2))-O(2)#13 | 101.0(4)   | O(2)#4-Cd(2))-O(2)#13  | 106.0(7)   |
| O(2)#7-Cd(2))-O(2)#13  | 31.0(7)    | O(2)#8-Cd(2))-O(2)     | 79.0(4)    |
| O(2)#9-Cd(2))-O(2)     | 106.0(6)   | O(2)#10-Cd(2))-O(2)    | 31.0(7)    |
| O(2)#2-Cd(2))-O(2)     | 79.0(4)    | O(2)#11-Cd(2))-O(2)    | 149.0(7)   |
| O(2)#12-Cd(2))-O(2)    | 101.0(4)   | O(2)#4-Cd(2))-O(2)     | 59.2(7)    |
| O(2)#7-Cd(2))-O(2)     | 74.0(6)    | O(2)#13-Cd(2))-O(2)    | 101.0(4)   |
| O(2)#8-Cd(2))-O(2)#14  | 101.0(4)   | O(2)#9-Cd(2))-O(2)#14  | 74.0(6)    |
| O(2)#10-Cd(2))-O(2)#14 | 149.0(7)   | O(2)#2-Cd(2))-O(2)#14  | 101.0(4)   |
| O(2)#11-Cd(2))-O(2)#14 | 31.0(7)    | O(2)#12-Cd(2))-O(2)#14 | 79.0(4)    |
| O(2)#4-Cd(2))-O(2)#14  | 120.8(7)   | O(2)#7-Cd(2))-O(2)#14  | 106.0(6)   |
| O(2)#13-Cd(2))-O(2)#14 | 79.0(4)    | O(2)-Cd(2))-O(2)#14    | 180.0(6)   |
| O(2)#8-Cd(2))-O(2)#15  | 106.0(7)   | O(2)#9-Cd(2))-O(2)#15  | 79.0(4)    |
| O(2)#10-Cd(2))-O(2)#15 | 101.0(4)   | O(2)#2-Cd(2))-O(2)#15  | 149.0(7)   |
| O(2)#11-Cd(2))-O(2)#15 | 79.0(4)    | O(2)#12-Cd(2))-O(2)#15 | 31.0(7)    |
| O(2)#4-Cd(2))-O(2)#15  | 180.0(6)   | O(2)#7-Cd(2))-O(2)#15  | 101.0(4)   |
| O(2)#13-Cd(2))-O(2)#15 | 74.0(6)    | O(2)-Cd(2))-O(2)#15    | 120.8(7)   |
| O(2)#14-Cd(2))-O(2)#15 | 59.2(7)    | O(1)-B(1))-F(1)#19     | 109.471(2) |
| O(1)-B(1))-O(1)#19     | 109.471(2) | F(1)#19-B(1))-O(1)#19  | 0.0(18)    |
| O(1)-B(1))-F(1)#20     | 109.5      | F(1)#19-B(1))-F(1)#20  | 109.5      |
| O(1)#19-B(1))-F(1)#20  | 109.5      | O(1)-B(1))-O(1)#20     | 109.5      |
| F(1)#19-B(1))-O(1)#20  | 109.5      | O(1)#19-B(1))-O(1)#20  | 109.5      |
| F(1)#20-B(1))-O(1)#20  | 0.0(18)    | O(1)-B(1))-O(1)#6      | 109.471(1) |
| F(1)#19-B(1))-O(1)#6   | 109.471(6) | O(1)#19-B(1))-O(1)#6   | 109.471(6) |
| F(1)#20-B(1))-O(1)#6   | 109.471(2) | O(1)#20-B(1))-O(1)#6   | 109.471(2) |
| O(1)-B(1))-F(1)#6      | 109.471(1) | F(1)#19-B(1))-F(1)#6   | 109.471(6) |
| O(1)#19-B(1))-F(1)#6   | 109.471(6) | F(1)#20-B(1))-F(1)#6   | 109.471(2) |
| O(1)#20-B(1))-F(1)#6   | 109.471(2) | O(1)#6-B(1))-F(1)#6    | 0.0(18)    |
| O(2)#5-B(2))-O(2)#21   | 119.95(11) | O(2)#5-B(2))-O(2)      | 65.3(12)   |
| O(2)#21-B(2))-O(2)     | 174.1(16)  | O(2)#5-B(2))-O(2)#22   | 174.1(16)  |

|                       |            |                       |            |
|-----------------------|------------|-----------------------|------------|
| O(2)#21-B(2))-O(2)#22 | 54.7(12)   | O(2)-B(2))-O(2)#22    | 119.95(11) |
| O(2)#5-B(2))-O(2)#23  | 54.7(12)   | O(2)#21-B(2))-O(2)#23 | 65.3(12)   |
| O(2)-B(2))-O(2)#23    | 119.95(11) | O(2)#22-B(2))-O(2)#23 | 119.95(11) |
| O(2)#5-B(2))-O(2)#10  | 119.95(11) | O(2)#21-B(2))-O(2)#10 | 119.95(11) |
| O(2)-B(2))-O(2)#10    | 54.7(12)   | O(2)#22-B(2))-O(2)#10 | 65.3(12)   |
| O(2)#23-B(2))-O(2)#10 | 174.1(16)  |                       |            |

|                         |                            |                           |
|-------------------------|----------------------------|---------------------------|
| #1 $-y+1/2, -z+1/2, -x$ | #2 $y-1/4, -z+1/2, x+1/4$  | #3 $x+1/4, -z+1/2, y-1/4$ |
| #4 $-x, -z+1/2, -y+1/2$ | #5 $z, y, x$               | #6 $-x+1/4, y, -z+1/4$    |
| #7 $-z+1/4, y, -x+1/4$  | #8 $z-1/4, x+1/4, -y+1/2$  | #9 $z-1/4, -y+1/2, x+1/4$ |
| #10 $-y+1/4, -x+1/4, z$ | #11 $y-1/4, x+1/4, -z+1/2$ | #12 $-y+1/4, z, -x+1/4$   |
| #13 $-z+1/4, -x+1/4, y$ | #14 $-x, -y+1/2, -z+1/2$   | #15 $x, z, y$             |
| #16 $z, x+1/2, y-1/2$   | #17 $y-1/2, z+1/2, x$      | #18 $-z, -x+1/2, -y+1/2$  |
| #19 $-x+1/4, -y+5/4, z$ | #20 $x, -y+5/4, -z+1/4$    | #21 $x, -z+1/4, -y+1/4$   |
| #22 $-y+1/4, -z+1/4, x$ | #23 $z, -x+1/4, -y+1/4$    |                           |

**Table S2.** Bond valence analysis of Cd<sub>8</sub>B<sub>5</sub>O<sub>15</sub>F.<sup>a,b</sup>

| Atoms      | l     | s       | Atoms      | l     | s       |
|------------|-------|---------|------------|-------|---------|
| Cd(1)-O(1) | 2.394 | 0.1995  | B(1)-O(1)  | 1.467 | 0.57825 |
| Cd(1)-O(1) | 2.394 | 0.1995  | B(1)-O(1)  | 1.467 | 0.57825 |
| Cd(1)-O(2) | 2.281 | 0.361   | B(1)-O(1)  | 1.467 | 0.57825 |
| Cd(1)-O(2) | 2.281 | 0.361   | B(1)-O(1)  | 1.467 | 0.57825 |
| Cd(1)-O(2) | 2.307 | 0.336   | B(1)-F(1)  | 1.467 | 0.15125 |
| Cd(1)-O(2) | 2.307 | 0.336   | B(1)-F(1)  | 1.467 | 0.15125 |
| Cd(1)-F(1) | 2.394 | 0.04375 | B(1)-F(1)  | 1.467 | 0.15125 |
| Cd(1)-F(1) | 2.394 | 0.04375 | B(1)-F(1)  | 1.467 | 0.15125 |
| $\Sigma s$ |       | 1.8805  | $\Sigma s$ |       | 2.918   |
| Cd(2)-O(2) | 2.321 | 0.324   | B(2)-O(2)  | 1.352 | 1.053   |
| Cd(2)-O(2) | 2.321 | 0.324   | B(2)-O(2)  | 1.352 | 1.053   |
| Cd(2)-O(2) | 2.321 | 0.324   | B(2)-O(2)  | 1.352 | 1.053   |
| Cd(2)-O(2) | 2.321 | 0.324   | $\Sigma s$ |       | 3.159   |
| Cd(2)-O(2) | 2.321 | 0.324   | F(1)-Cd(1) | 2.394 | 0.175   |
| Cd(2)-O(2) | 2.321 | 0.324   | F(1)-Cd(1) | 2.394 | 0.175   |
| $\Sigma s$ |       | 1.944   | F(1)-Cd(1) | 2.394 | 0.175   |
|            |       |         | F(1)-B1    | 1.467 | 0.605   |
|            |       |         | $\Sigma s$ |       | 1.13    |

<sup>a</sup> Bond valences calculated with the program Bond Valence Calculator Version 2.00, Hormillosa, C., Healy, S., Stephen, T. McMaster University (1993).

<sup>b</sup> Valence sums calculated with the formula:  $S_i = \exp[(R_0 - R_i)/B]$ , where  $S_i$  = valence of bond "i" and  $B = 0.37$ . Superscripts indicate the number of equivalent bonds for anions.
